# Supplementary material for: Characteristics of aquatic rescues undertaken by bystanders in Australia
Source: PLOS journal article supplement (doi:10.1371/journal.pone.0212349), 2019-02-14
Supplement: S3 (10.1371/journal.pone.0212349.s003) [file journal.pone.0212349.s003]

### Appendix 3. Actions that the bystanders indicated they would do differently next time they performed a rescue.

|                                                           | Waterway Location |      |        | Gender |        | Water Safety Training at time of rescue |                  |               |
|-----------------------------------------------------------|-------------------|------|--------|--------|--------|-----------------------------------------|------------------|---------------|
|                                                           | Coastal           | Pool | Inland | Male   | Female | None                                    | Bronze Medallion | Water trained |
| Grab a flotation device                                   | 4                 | 1    | 1      | 4      | 2      | 2                                       | 1                | 3             |
| Tell someone else                                         | 9                 | 1    | 0      | 3      | 7      | 3                                       | 1                | 6             |
| Grab a flotation device AND tell someone                  | 1                 | 0    | 0      | 1      | 0      | 0                                       | 0                | 1             |
| Calm the person down                                      | 2                 | 0    | 0      | 1      | 1      | 1                                       | 1                | 0             |
| Ensure parental supervision                               | 3                 | 2    | 0      | 3      | 2      | 3                                       | 1                | 1             |
| Assist earlier                                            | 2                 | 1    | 1      | 3      | 1      | 2                                       | 0                | 2             |
| Escape the water/rip in a different way                   | 3                 | 0    | 1      | 4      | 0      | 0                                       | 1                | 3             |
| Prevention- warn the people before they get in to trouble | 2                 | 0    | 0      | 2      | 0      | 0                                       | 1                | 1             |
| Other                                                     | 7                 | 0    | 1      | 5      | 3      | 5                                       | 0                | 3             |
